# Supplementary material for: A Zr-Al-Beta zeolite with open Zr(iv) sites: an efficient bifunctional Lewis–Brønsted acid catalyst for a cascade reaction
Source: Royal Society of Chemistry journal article supplement (doi:10.1039/c9cy00853e), 2019-01-01
Supplement: c9cy00853e1.pdf [file c9cy00853e1.pdf]

## Electronic Supplementary Information (ESI)

Zr-Al-Beta zeolite with open Zr(IV) sites: an efficient bifunctional Lewis-Brønsted acidic catalyst of cascade reaction

Gang Li<sup>a,b</sup>, Lou Gao<sup>a</sup>, Zhizheng Sheng<sup>a</sup>, Yulu Zhan<sup>a</sup>, Chaoyang Zhang<sup>b</sup>, Jing Ju<sup>\*c</sup>,  
Yahong Zhang<sup>\*a</sup>, and Yi Tang<sup>a</sup>

<sup>a</sup>Department of Chemistry, Shanghai Key Laboratory of Molecular Catalysis and Innovative Materials, Laboratory of Advanced Materials, Collaborative Innovation Centre of Chemistry for Energy Materials (iChEM), Fudan University, 220 Handan Road, Shanghai 200433, China.

<sup>b</sup>Institute of Chemical Materials, China Academy of Engineering Physics (CAEP), P.O. Box 919-311, Mianyang, Sichuan 621900, China.

<sup>c</sup>College of Chemistry and Molecular Engineering, Peking University, Beijing National Laboratory for Molecular Sciences (BNLMS), Beijing, 100871, People's Republic of China.

E-mail: zhangyh@fudan.edu.cn, jingju@pek.edu.cn

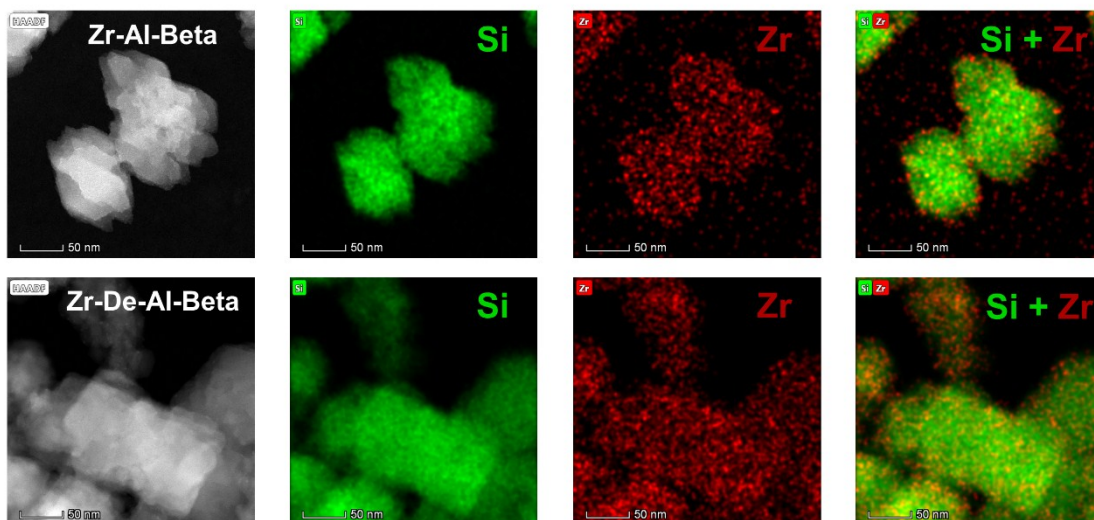

**Figure S1.** HAADF-STEM images and super-X-EDS mapping images of Zr-Al-Beta (up) and Zr-De-Al-Beta (down).

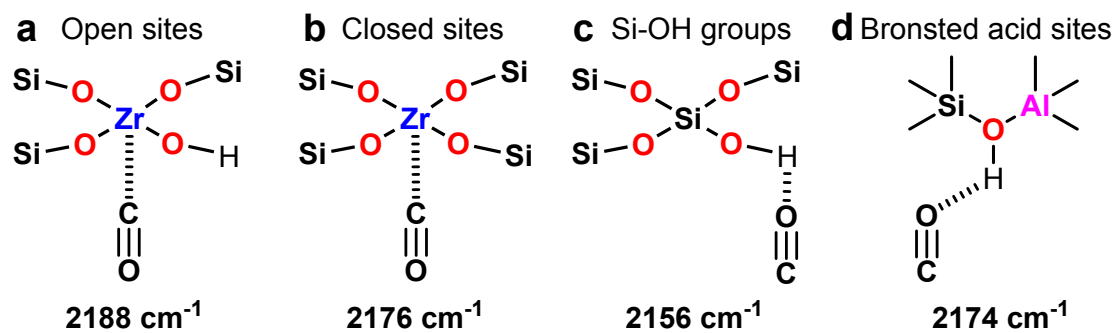

**Scheme S1.** The representative structure configurations of CO adsorbed over different sites.

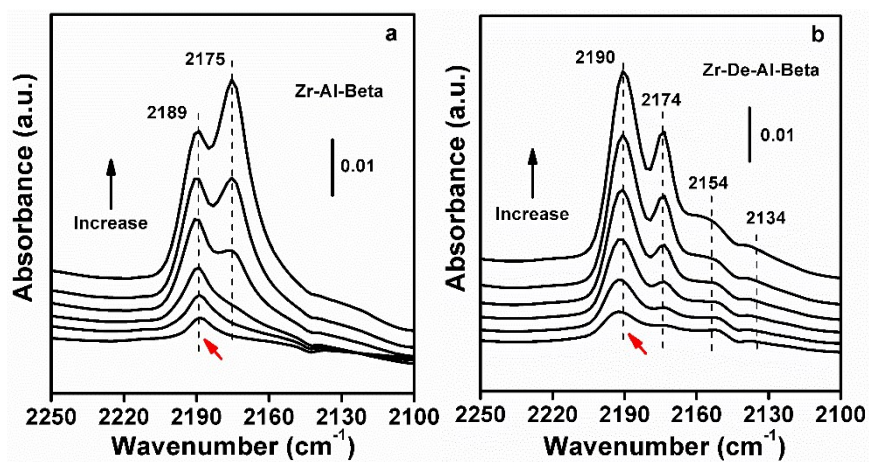

**Figure S2.** FT-IR spectra adsorbed CO over Zr-Al-Beta (a) and Zr-De-Al-Beta (b) with the increase in CO coverage.

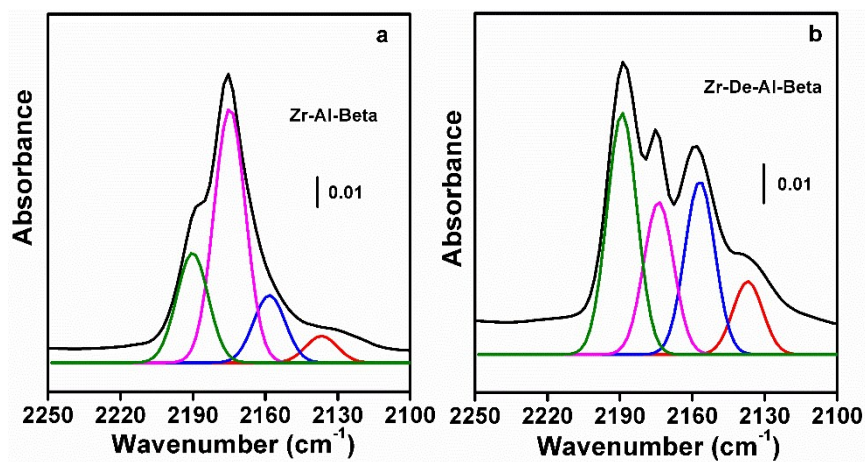

**Figure S3.** Deconvolution of FT-IR spectra after CO adsorption over Zr-Al-Beta (a) and Zr-De-Al-Beta (b).

**Table S1.** Relative peak area of the open sites in Zr-Al-Beta and Zr-De-Al-Beta.

| Catalyst      | Open sites (2189 cm <sup>-1</sup> ) |
|---------------|-------------------------------------|
| Zr-Al-Beta    | 0.2968                              |
| Zr-De-Al-Beta | 0.0811                              |
| Ratio         | 3.4 <sup>a</sup>                    |

<sup>a</sup>Normalized by Zr contents from Table 1.

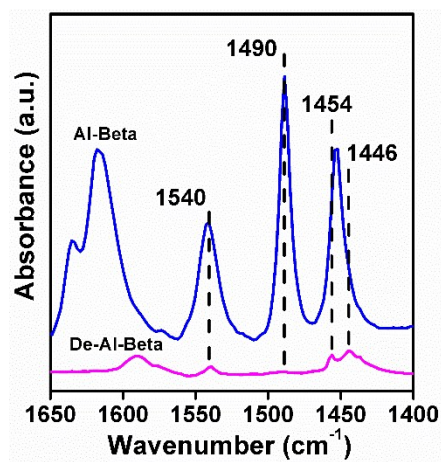

**Figure S4.** Pyridine-FT-IR spectra desorption at 573 K of Al-Beta and De-Al-Beta.

**Table S2.** Catalytic performance of reported catalysts for the MPV reduction of CAL.

| Entry | catalyst                                         | CAL Conv.<br>(%)  | CPE yield<br>(%) | Reference                                  |
|-------|--------------------------------------------------|-------------------|------------------|--------------------------------------------|
| 1     | Zr-Al-Beta                                       | 97.3 <sup>a</sup> | 93.9             | This work                                  |
| 2     | Zr-Al-Beta-F                                     | 80.0 <sup>b</sup> | 60.0             | <i>J. Catal.</i> 2006, 241, 25.            |
| 3     | SiO <sub>2</sub> -Al <sub>2</sub> O <sub>3</sub> | 21.6 <sup>c</sup> | 14.5             | <i>Catal. Sci. Technol.</i> 2017, 7, 4511. |
| 4     | Zr-UiO-66                                        | 17.0 <sup>d</sup> | 2.0              | <i>J. Catal.</i> 2016, 340, 136.           |

a: 2 mmol of cinnamaldehyde, 100 mmol of isopropanol, 100 mg of catalyst, 82 °C, reflux, 5 h.

b: 1.3 mmol of cinnamaldehyde, 83 mmol of isopropanol, 100 mg of catalyst, 82 °C, reflux, 5 h.

c: 0.5 mL of cinnamaldehyde, 10 mL of isopropanol, 200 mg of catalyst, 150 °C, 4 h.

d: 1.15 mmol of cinnamaldehyde, 3.3 mL of isopropanol, 7.8% mol of Zr, 82 °C, reflux, 24 h.



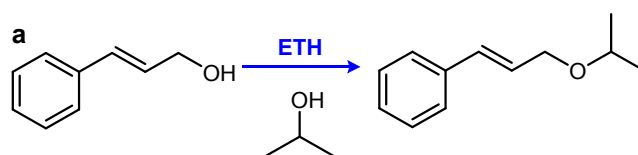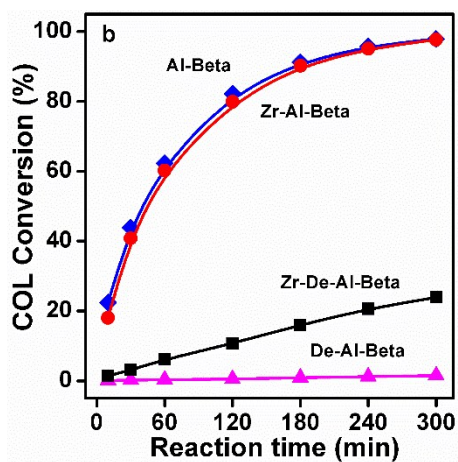

**Figure S5.** Scheme of the etherification of COL with IPA (a), catalytic performance of Al-Beta, Zr-Al-Beta, Zr-De-Al-Beta and De-Al-Beta for the etherification of COL with IPA (b).

Reaction conditions: 2 mmol of cinnamyl alcohol, 100 mmol of isopropanol, 100 mg of catalyst, 82 °C, reflux.

**Table S3.** Catalytic results of Al-Beta, Zr-Al-Beta and Zr-De-Al-Beta for the cascade reaction with or without the addition of DBT-Py.

| Sample                                    | 10 min | 30 min | 1 h  | 2 h  | 3 h  | 4 h  | 5 h  |
|-------------------------------------------|--------|--------|------|------|------|------|------|
| <b>Al-Beta<sup>a</sup></b>                |        |        |      |      |      |      |      |
| CAL Conv. (%)                             | 7.4    | 12.2   | 18.8 | 27.4 | 34.5 | 41.2 | 47.1 |
| COL Yield (%)                             | 1.9    | 1.9    | 1.3  | 0.6  | 0.4  | 0.3  | 0.3  |
| CPE Yield (%)                             | 5.5    | 10.3   | 17.5 | 26.8 | 34.1 | 40.9 | 46.8 |
| <b>Al-Beta (DTB-Py)<sup>b</sup></b>       |        |        |      |      |      |      |      |
| CAL Conv. (%)                             | 0.5    | 0.9    | 1.2  | 1.8  | 2.5  | 2.7  | 2.9  |
| COL Yield (%)                             | 0.5    | 0.9    | 1.2  | 1.8  | 2.5  | 2.7  | 2.9  |
| CPE Yield (%)                             | 0.0    | 0.0    | 0.0  | 0.0  | 0.0  | 0.0  | 0.0  |
| <b>Zr-Al-Beta<sup>a</sup></b>             |        |        |      |      |      |      |      |
| CAL Conv. (%)                             | 18.6   | 42.3   | 65.1 | 87.7 | 94.6 | 96.7 | 97.3 |
| COL Yield (%)                             | 10.9   | 17.4   | 20.7 | 18.9 | 12.5 | 7.2  | 3.4  |
| CPE Yield (%)                             | 7.7    | 24.9   | 44.4 | 68.8 | 82.1 | 89.5 | 93.9 |
| <b>Zr-Al-Beta (DTB-Py)<sup>b</sup></b>    |        |        |      |      |      |      |      |
| CAL Conv. (%)                             | 4.9    | 11.2   | 20.9 | 35.2 | 47.9 | 57.9 | 65.5 |
| COL Yield (%)                             | 4.5    | 10.4   | 19.0 | 32.3 | 44.0 | 53.0 | 60.3 |
| CPE Yield (%)                             | 0.4    | 0.8    | 2.0  | 2.8  | 3.9  | 4.9  | 5.2  |
| <b>Zr-De-Al-Beta<sup>a</sup></b>          |        |        |      |      |      |      |      |
| CAL Conv. (%)                             | 1.2    | 3.4    | 7.4  | 15.6 | 23.9 | 32.8 | 41.0 |
| COL Yield (%)                             | 1.2    | 2.8    | 5.6  | 8.7  | 11.3 | 13.6 | 14.1 |
| CPE Yield (%)                             | 0.0    | 0.6    | 1.8  | 6.9  | 12.6 | 19.2 | 26.9 |
| <b>Zr-De-Al-Beta (DTB-Py)<sup>b</sup></b> |        |        |      |      |      |      |      |
| CAL Conv. (%)                             | 0.5    | 1.3    | 2.8  | 5.5  | 8.6  | 11.7 | 14.3 |
| COL Yield (%)                             | 0.5    | 1.3    | 2.8  | 5.5  | 8.6  | 11.7 | 14.3 |
| CPE Yield (%)                             | 0.0    | 0.0    | 0.0  | 0.0  | 0.0  | 0.0  | 0.0  |

<sup>a</sup>Reaction conditions: 2 mmol of cinnamaldehyde, 100 mmol of isopropanol, 100 mg of catalyst, 82 °C, reflux. <sup>b</sup> Reaction conditions: 2 mmol of cinnamaldehyde, 100 mmol of isopropanol, 100 mg of catalyst, 1.0 equivalents of total acids of DTB-Py, 82 °C, reflux.

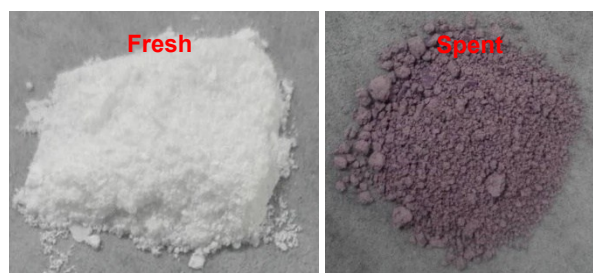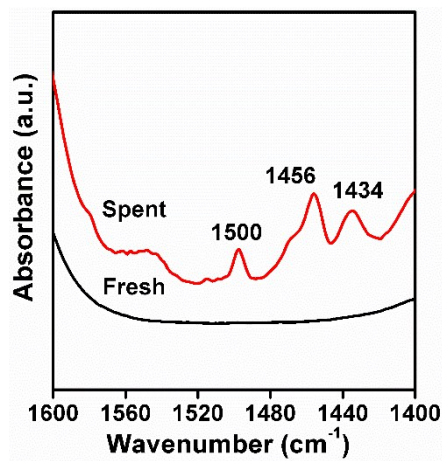

**Figure S6.** Photos and FT-IR spectra of fresh and spent Zr-Al-Beta.

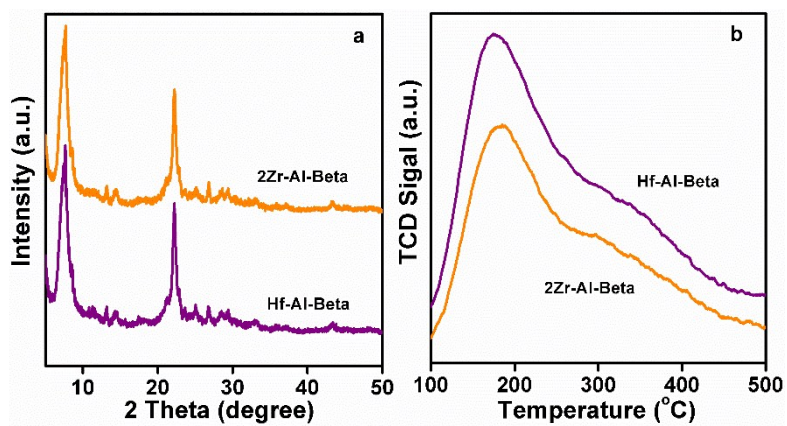

**Figure S7.** XRD patterns and NH<sub>3</sub>-TPD profiles of 2Zr-Al-Beta and Hf-Al-Beta.
